# Supplementary material for: A Non-Invasive Tool for Real-Time Measurement of Sulfate in Living Cells
Source: MDPI journal article supplement (doi:10.3390/ijms21072572), 2020-04-07
Supplement: s1 [file s1]

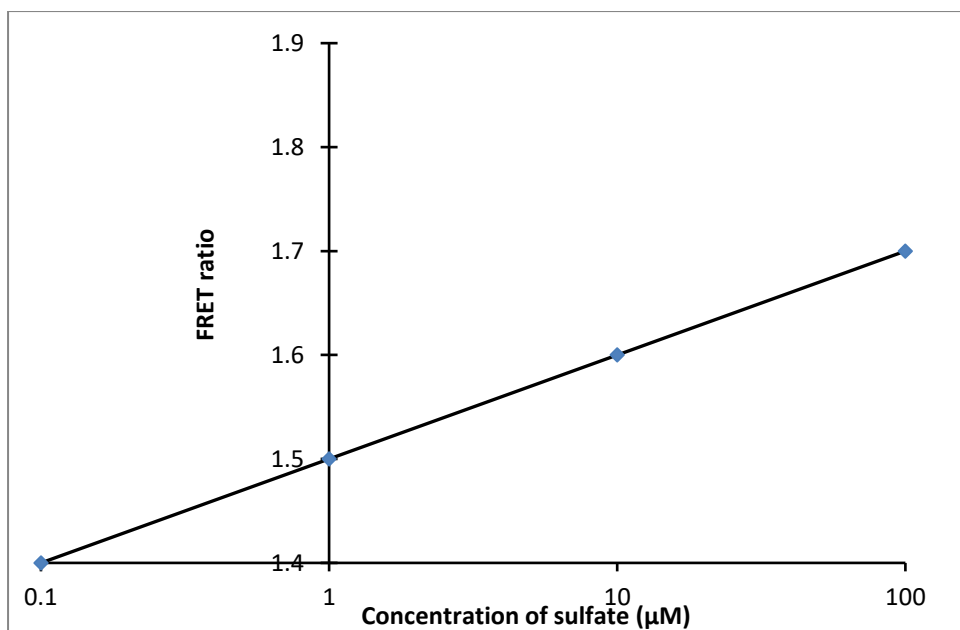

Figure S1. Standard curve of sulfate concentration and FRET ratio
